# Supplementary material for: Effects of agitation on particle-size distribution and enzymatic hydrolysis of pretreated spruce and giant reed
Source: PubMed Central journal article supplement (PMC4035727; doi:10.1186/1754-6834-7-77), 2014-05-23
Supplement: 1754-6834-7-77-S1.pdf [file 1754-6834-7-77-S1.pdf]

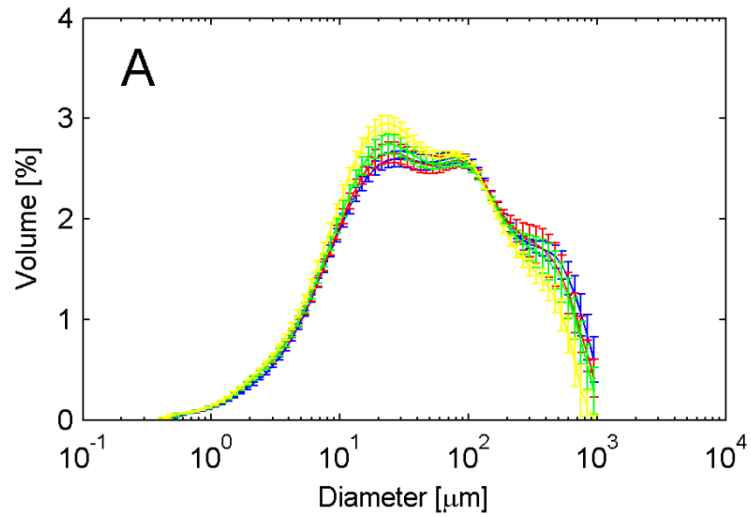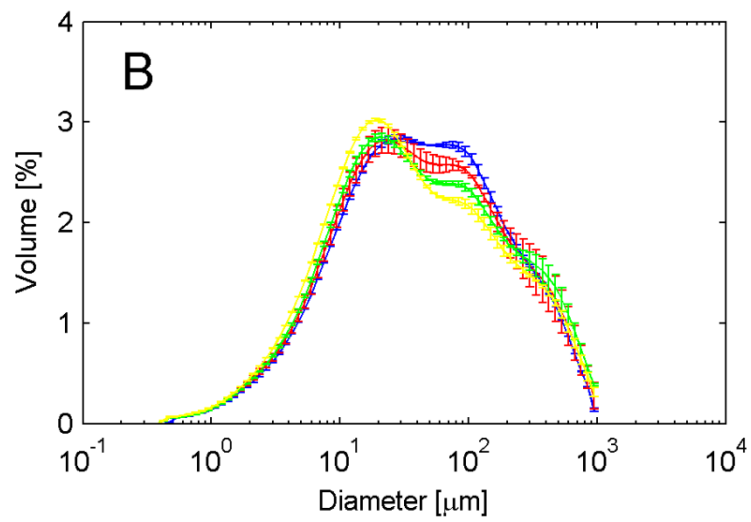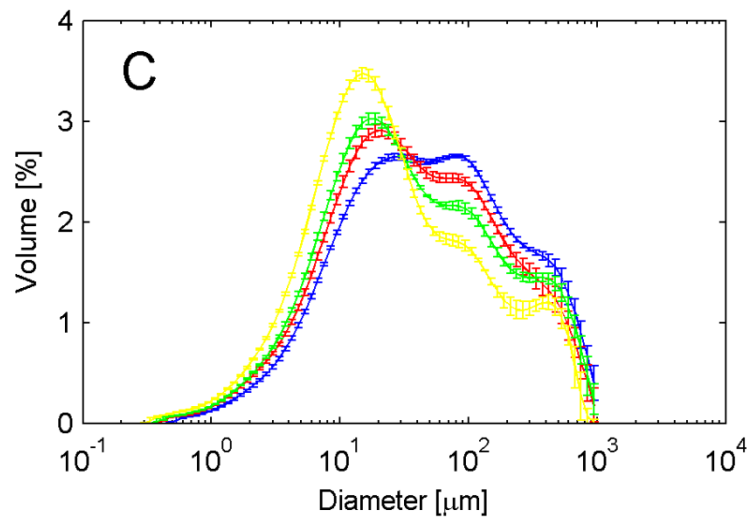

**Volume-based particle-size distribution during enzymatic hydrolysis of spruce at 13% WIS. (A)** Impeller speed of 100 rpm. **(B)** Impeller speed of 300 rpm. **(C)** Impeller speed of 600 rpm. **Markers:** blue line 0h, red line 4h, green line 24h, yellow line 96h.
